# Supplementary material for: Aggregation and neurotoxicity of recombinant α-synuclein aggregates initiated by dimerization
Source: PubMed Central journal article supplement (PMC3764494; doi:10.1186/1750-1326-8-5), 2013-01-22
Supplement: 1750-1326-8-5-S7.pdf [file 1750-1326-8-5-S7.pdf]

Table S1. Oligonucleotides used to produce  $\alpha$ -Syn constructs

| <b>Oligonucleotide Name</b>             | <b>Sequence (5'-3')</b>                              |
|-----------------------------------------|------------------------------------------------------|
| $\alpha$ -Syn-Fw                        | CTTGCCTTCAAGCCTTCTGCCTTT                             |
| $\alpha$ -Syn-Rv                        | GGCACATTGGAAGTGAAGCACTTGT                            |
| $\alpha$ -Syn-His-Fw                    | GCCGGCATCATATGGATGTATTCATGAAAGG                      |
| $\alpha$ -Syn-His-Rv                    | ATGCAAGCTTAGTGGTGGTGGTGGTGGTGGGCTTCA<br>GGTTCGTAGTC  |
| $\alpha$ -Syn-Fv-Fw                     | GACTACGAACCTGAAGCCTCTAGAGGAGTGCAGGTG                 |
| $\alpha$ -Syn-Fv-Rv                     | CACCTGCACTCCTCTAGAGGCTTCAGGTTCGTAGTC                 |
| Fv-His-Rv                               | ATGCAAGCTTAGTGGTGGTGGTGGTGGTGTGCGTAG<br>TCTGGTACGTCG |
| $\alpha$ -Syn-Fw <sup>Y136-TAT</sup>    | GGAAGGGTATCAAGACTATGAACCTGAAGCCCACC                  |
| $\alpha$ -Syn-Rv <sup>Y136-TAT</sup>    | GGTGGGCTTCAGGTTCATAGTCTTGATACCCTTCC                  |
| $\alpha$ -Syn-Fv-Fw <sup>Y136-TAT</sup> | GGAAGGGTATCAAGACTATGAACCTGAAGCCTCTAG<br>AGG          |
| $\alpha$ -Syn-Fv-Rv <sup>Y136-TAT</sup> | CCTCTAGAGGCTTCAGGTTCATAGTCTTGATACCCTT<br>CC          |
